# Supplementary material for: 5V-class high-voltage batteries with over-lithiated oxide and a multi-functional additive
Source: Royal Society of Chemistry journal article supplement (doi:10.1039/c4ta06531j), 2015-01-01
Supplement: c4ta06531j1.pdf [file c4ta06531j1.pdf]

## Electronic Supplementary Information

### 5V-Class High-Voltage Batteries with Over-Lithiated Oxide and a Multi-Functional Additive

Taeun Yim,<sup>a</sup> Sang-Gil Woo,<sup>a</sup> Sang Hoo Lim,<sup>a</sup> Woosuk Cho,<sup>a</sup> Jun Ho Song,<sup>a</sup>

Young-Kyu Han,<sup>b,\*</sup> Young-Jun Kim<sup>a,\*</sup>

<sup>a</sup>*Advanced Batteries Research Center, Korea Electronics Technology Institute,*

*Seongnam-si, Gyeonggi-do, Republic of Korea*

<sup>b</sup>*Department of Energy and Materials Engineering and Advanced Energy and Electronic*

*Materials Research Center, Dongguk University-Seoul, Seoul 100-715, Republic of Korea*

E-mail : yjkim@keti.re.kr (Y.-J. Kim), ykenergy@dongguk.edu (Y.-K. Han)

(a)  $^1\text{H-NMR}$  for EC and EMC with  $\text{Li}_2\text{O}$

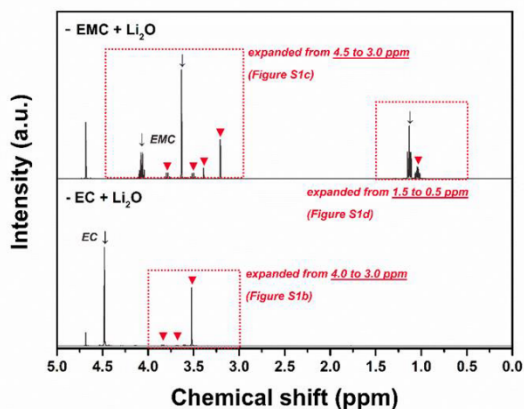

(b)  $^1\text{H-NMR}$  for EC with  $\text{Li}_2\text{O}$  (4.0 to 3.0 ppm)

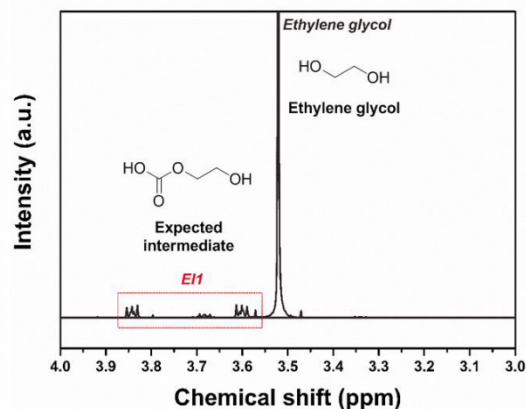

(c)  $^1\text{H-NMR}$  for EMC with  $\text{Li}_2\text{O}$  (4.5 to 3.0 ppm)

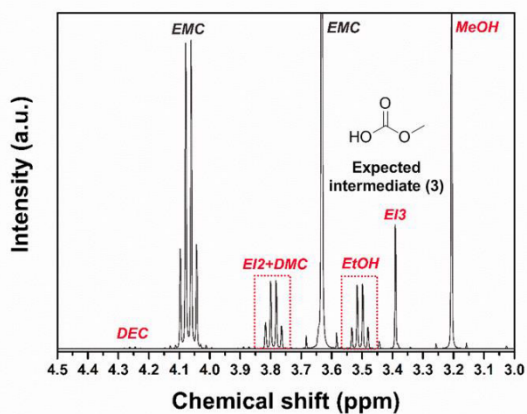

(d)  $^1\text{H-NMR}$  for EMC with  $\text{Li}_2\text{O}$  (1.5 to 0.5 ppm)

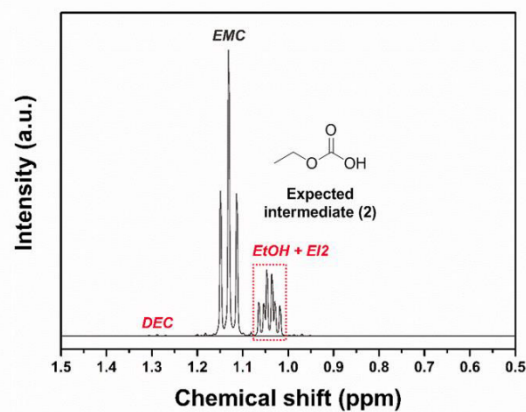

**Fig. S1** (a)  $^1\text{H-NMR}$  analysis results for supernatants of carbonate-based solvents (EC and EMC) with  $\text{Li}_2\text{O}$ , (b) expanded  $^1\text{H-NMR}$  spectrum for EC supernatant (4.0 to 3.0 ppm), (c) expanded  $^1\text{H-NMR}$  spectrum for EMC supernatant (4.5 to 3.0 ppm), (d) expanded  $^1\text{H-NMR}$  spectrum for EMC supernatant (1.5 to 0.5 ppm)

## (a) Gas chromatography results

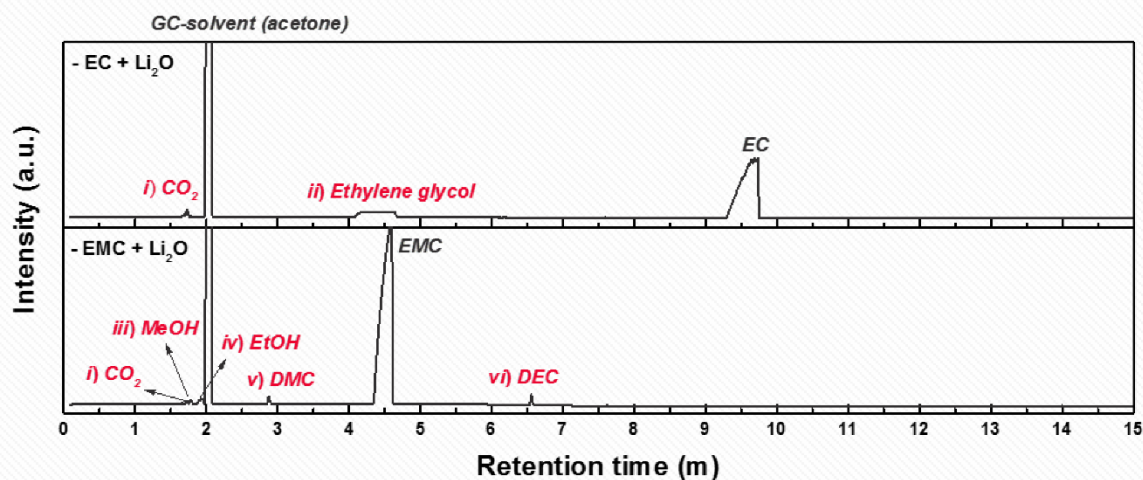

## (b) Mass analysis results

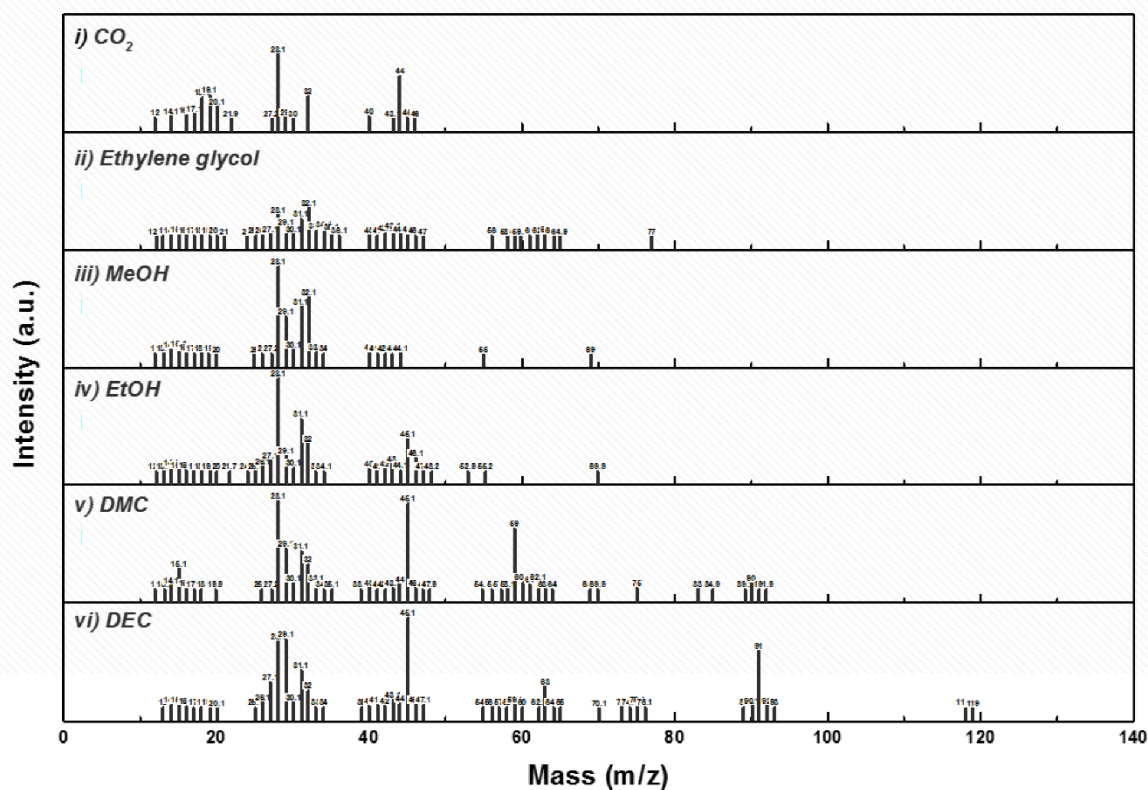

**Fig. S2** (a) GC analysis results for supernatants of carbonate-based solvents (EC and EMC) with Li<sub>2</sub>O, (b) Mass patterns for individual components formed by carbonate-based solvents decomposition

(a) Decomposition reaction of cyclic carbonate

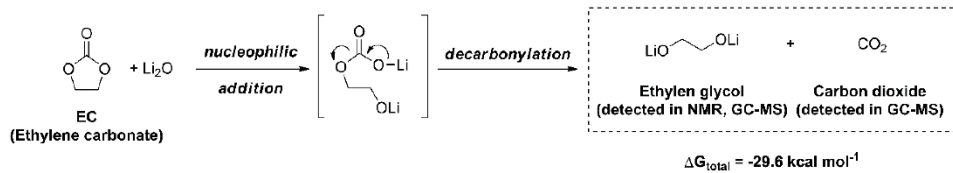

(b) Decomposition reaction of acyclic carbonate

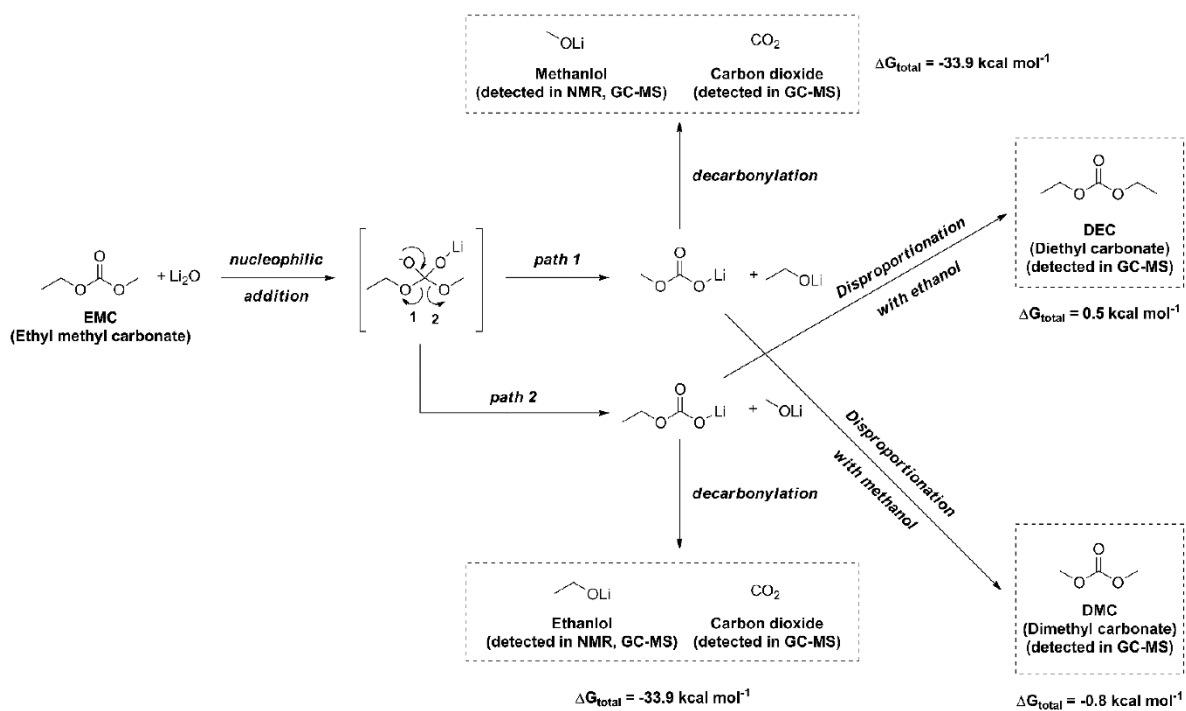

**Fig. S3** Suggested mechanism for chemical decomposition of solvents by Li<sub>2</sub>O: (a) EC, (b) EMC

### (a) Gas chromatography results

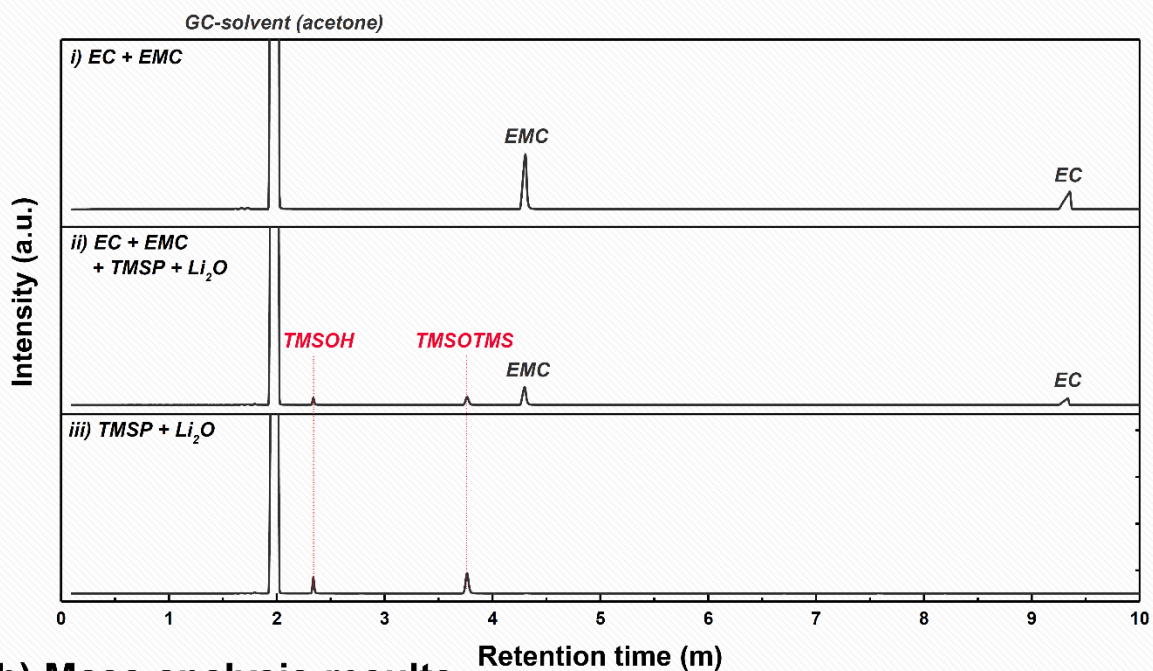

### (b) Mass analysis results

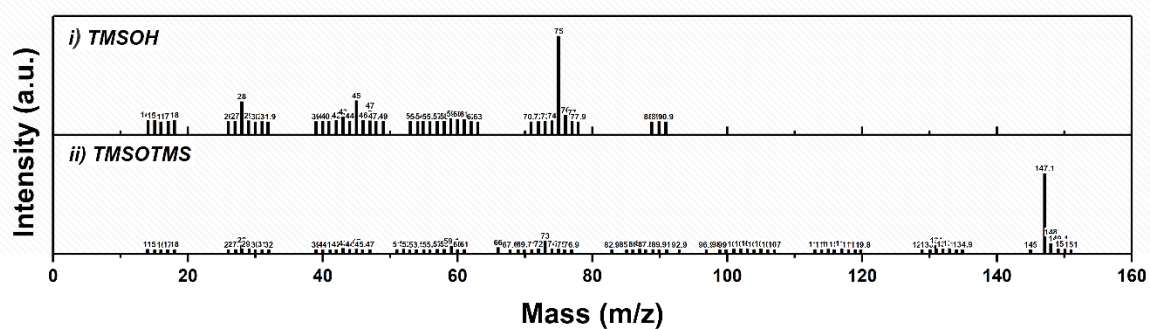

**Fig. S4** (a) GC analysis results of i) EC + EMC, ii) EC + EMC + TMSP + Li<sub>2</sub>O, and iii) TMSP + Li<sub>2</sub>O, (b) Mass pattern of i) TMSOH, and ii) TMSOTMS

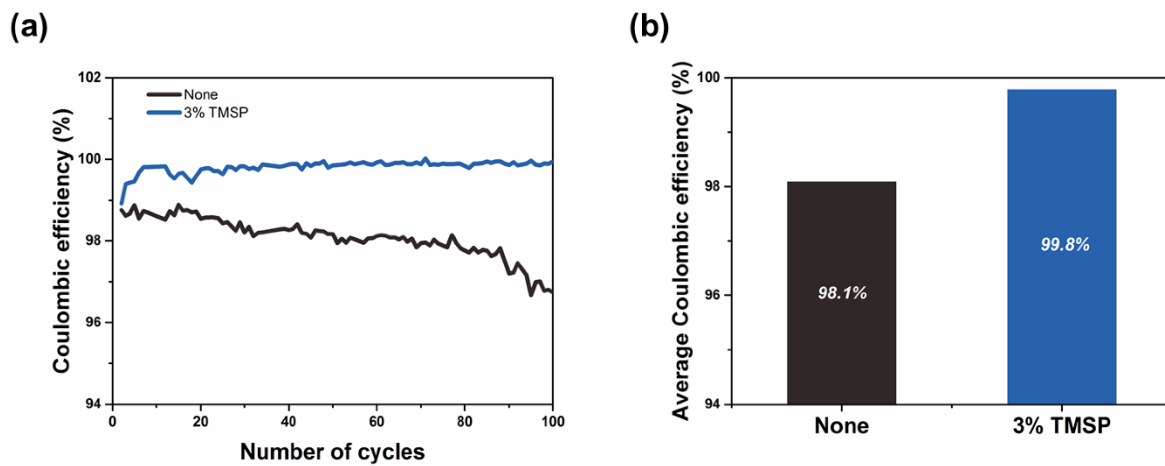

**Fig. S5** (a) Coulombic efficiency of the cell, (b) average Coulombic efficiency of the cell (black: standard electrolyte and blue: 3% TMSP-controlled electrolyte)

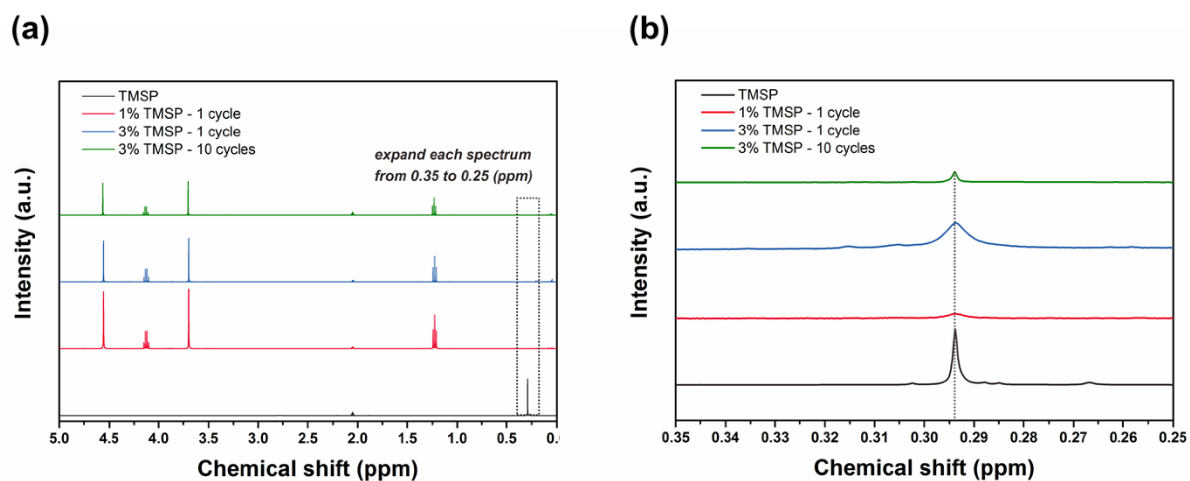

**Fig. S6** (a)  $^1\text{H-NMR}$  analyses of supernatants from cycled cell, (b) expanded  $^1\text{H-NMR}$  spectra from 0.35 to 0.25 (ppm) (black: reference TMSP, red: from the cell cycled with 1% TMSP-controlled electrolyte after 1 cycle, blue: from the cell cycled with 3% TMSP-controlled electrolyte after 1 cycle, green: from the cell cycled with 3% TMSP-controlled electrolyte after 10 cycles)

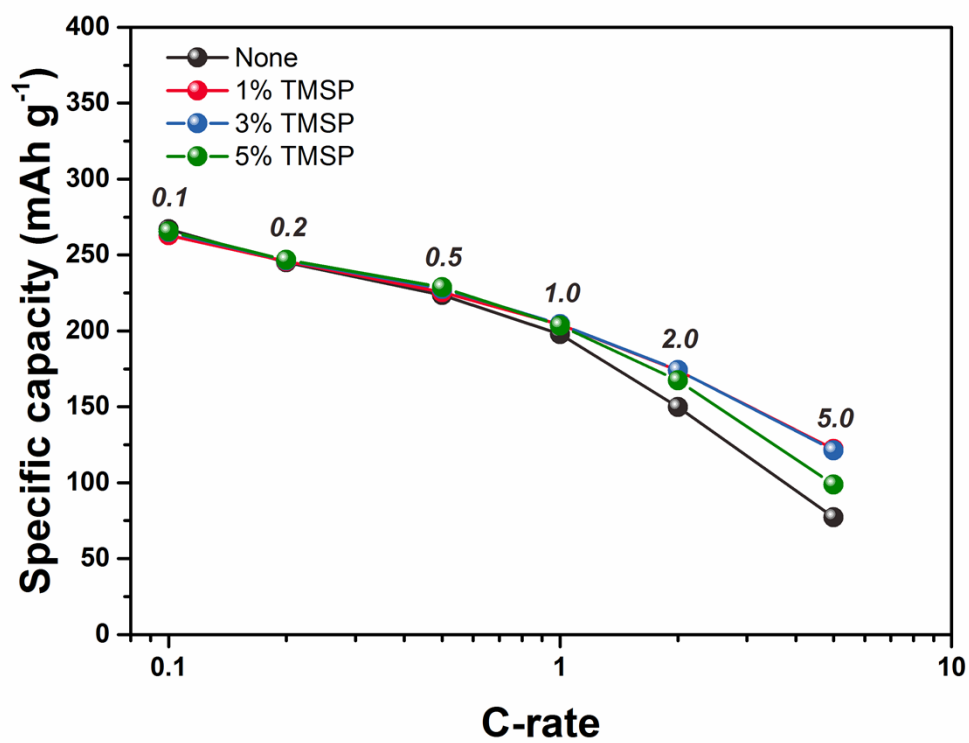

**Fig. S7** Rate capability of the cell with a variation of TMSP contents (black: standard electrolyte, red: 1% TMSP controlled electrolyte, blue: 3% TMSP-controlled electrolyte, green: 5% TMSP-controlled electrolyte)



**(a) After 1 cycle (TMSP)**

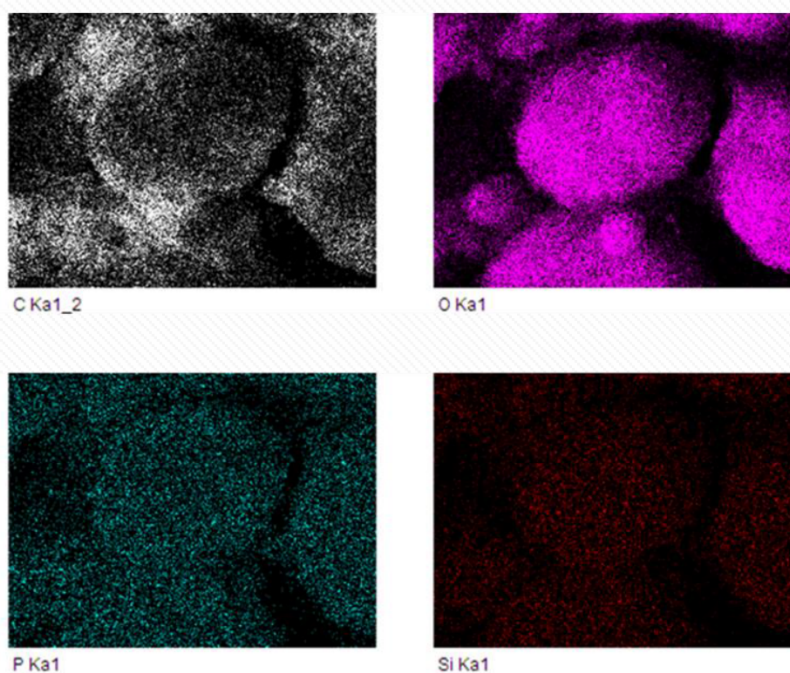

**(b) After 100 cycles (TMSP)**

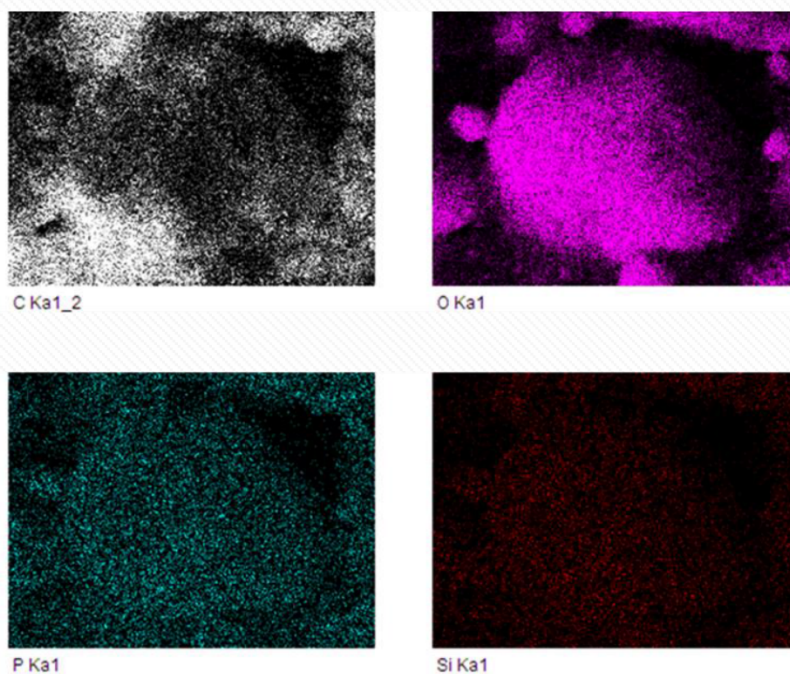

**Fig. S8** EDS analysis for cycled electrode with 3% TMSP (a) after 1 cycle, (b) after 100 cycles (black: carbon, purple: oxygen, green: phosphorus, red: silicon)

(a) Si2p analysis after 1 cycle

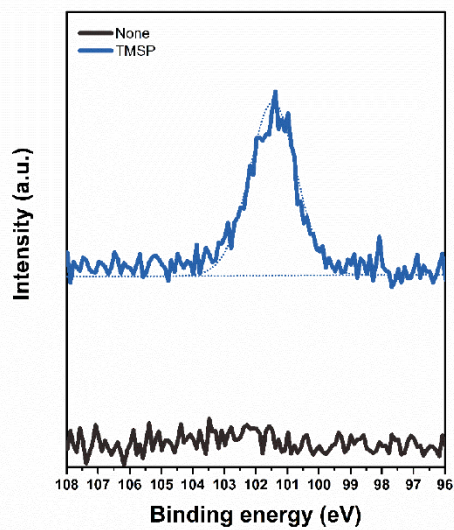

(b) Si2p analysis after 100 cycles

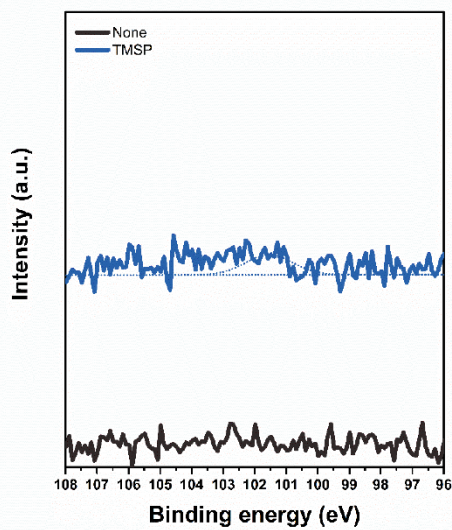

**Fig. S9** Si2p spectroscopic results (characterized by XPS) for cycled electrodes (a) after 1 cycle, (b) after 100 cycles (black: cycled with standard electrolyte, blue: cycled with TMSP-controlled electrolyte)
